# Supplementary material for: Polymorph selection during melt crystallization of the isotactic polybutene-1 homopolymer depending on the melt state and crystallization pressure
Source: Royal Society of Chemistry journal article supplement (doi:10.1039/d0sm01231a), 2020-01-01
Supplement: d0sm01231a1.pdf [file d0sm01231a1.pdf]

## Polymorph selection during melt crystallization of isotactic polybutene-1 homopolymer depending on melt state and crystallization pressure

Beibei Dong, Xiaokang Yang, Youxin Ji, Fengmei Su,\* Chunguang Shao,\* Chuntai

Liu

*National Engineering Research Center for Advanced Polymer Processing Technology, The Key Laboratory of Material Processing and Mold of Ministry of Education, College of Materials Science and Engineering, Zhengzhou University, Zhengzhou, 450002, China*

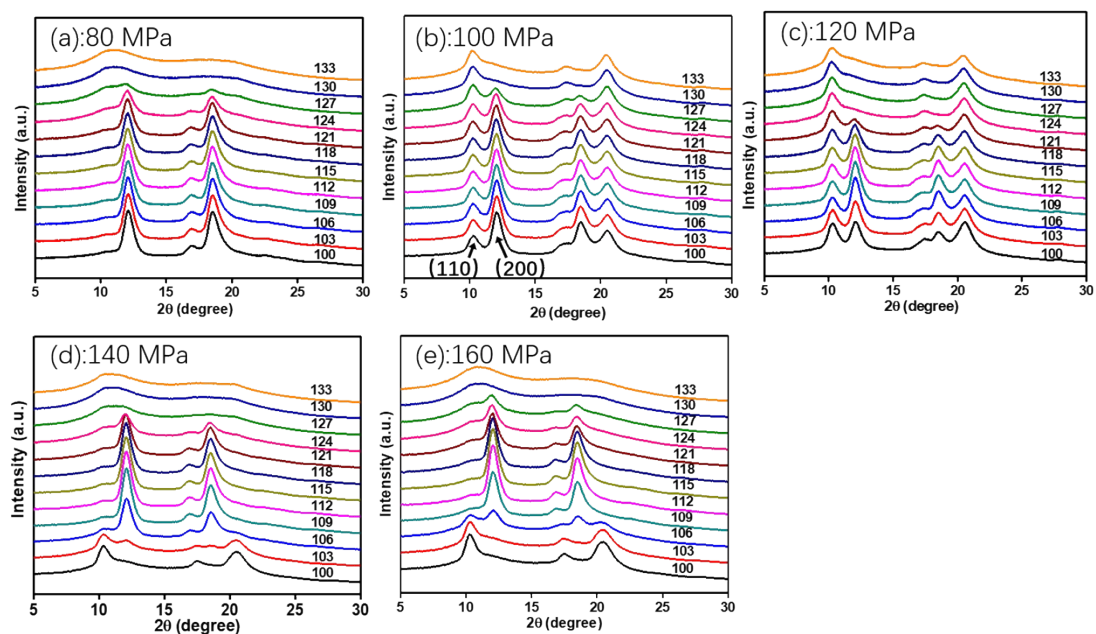

Figure S1. WAXD results on  $S_{130}$  crystallized at different  $P_{\text{cry}}$ . The numbers on the far right represented the heating temperature.

\*correspondence authors: [fmsu@zzu.edu.cn](mailto:fmsu@zzu.edu.cn), [shaochg@zzu.edu.cn](mailto:shaochg@zzu.edu.cn)

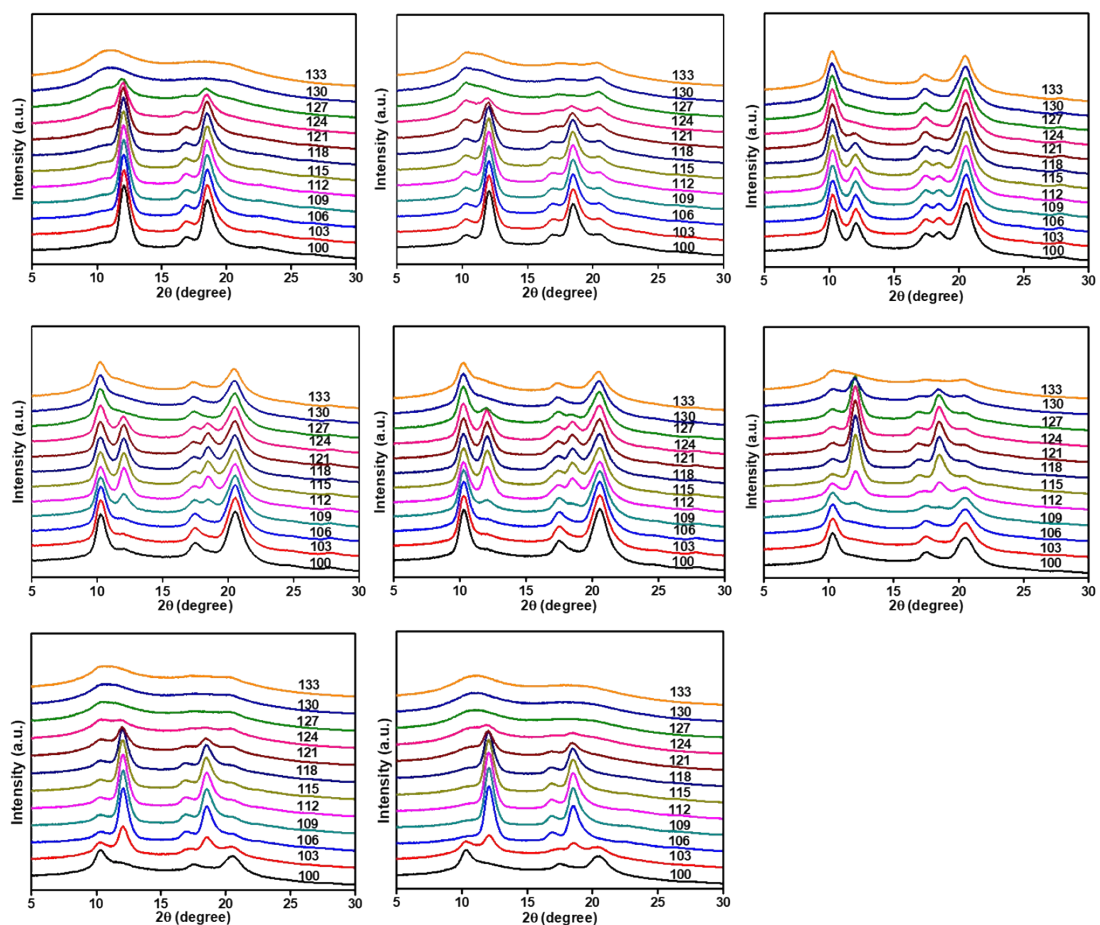

Figure S2. WAXD results on  $S_{180}$  crystallized at different  $P_{\text{cry}}$ . The numbers on the far right represented the heating temperature.
